# Supplementary material for: Global patterns of conservation research importance in different countries of the world
Source: PeerJ. 2016 Jul 5;4:e2173. doi: 10.7717/peerj.2173 (PMC4941742; doi:10.7717/peerj.2173)
Supplement: Table S1 [file peerj-04-2173-s001.xlsx]

## Sheet: conser2
Country	Conseravation publication	Ecology publication	All publications	Research	GDP	Latitude	Longitude	protection of species	Endengered species number	Total.Domestic.funding	Terrestrial area	PPP	Country.Area.km2	allpublog
Afghanistan	2	3	485	NA	202.879	33	65	NA	32	0.0714637	0.301776	14259367213	NA	2.06782
Albania	78	96	1543	0.120215	1428.33	41	20	0	52	0	8.11051	12677144917	0	28.4017
Algeria	3	123	25714	0.203906	1661.76	28	3	0.6	75	3.57204	6.30958	156000000000	60	0.699229
American Samoa	3	13	113	NA	NA	-14.3333	-170	NA	77	NA	1.49049	NA	NA	90.0804
Andorra	1	3	104	NA	15974.7	42.5	1.6	NA	9	0	5.71582	3447323618	NA	34.0426
Angola	0	6	442	NA	1328.13	-12.5	18.5	0	89	0.028639	11.1419	75658346957	0	47.8088
Anguilla	0	0	13	NA	NA	18.25	-63.1667	NA	31	NA	4.47725	1168628639	NA	22.6927
Antigua and Barbuda	1	0	75	NA	7229.71	17.05	-61.8	NA	38	1.76979	6.22126	348000000000	88.9	11.4917
Argentina	268	2758	118347	0.456004	4031.76	-34	-64	0.889	203	29.6429	4.93564	9893206227	0	11.7074
Armenia	4	14	9365	0.222632	1239.19	40	45	0	37	0	11.9667	NA	NA	2.33333
Aruba	0	0	40	NA	21269.4	12.5	-69.9667	NA	22	NA	0.0327833	1030000000000	100	16.5738
Australia	2398	16544	683585	1.83773	15249.5	-27	133	1	788	538.486	10.0833	395000000000	100	46.394
Austria	368	2375	214844	2.16661	16548.7	47.3333	13.3333	1	70	99.8574	14.6788	48267950354	0	10.9524
Azerbaijan	5	9	7472	0.285481	1659.91	40.5	47.5	0	40	0	9.71654	7629906346	NA	51.4486
Bahamas	2	26	258	NA	10567.6	24.25	-76	NA	54	1.11912	11.347	19714236548	NA	0.528917
Bahrain	0	44	3256	NA	11263.9	26	50.55	NA	30	5.58665	1.2718	105000000000	70.6	11.2576
Bangladesh	46	143	19481	NA	253.047	24	90	0.706	109	0.337079	1.77774	3453684349	NA	14.6512
Barbados	1	25	1195	NA	5211.22	13.1667	-59.5333	NA	35	0.107709	0.0914725	56463617339	50	40.7633
Belarus	2	61	24801	0.732527	2494.95	53	28	0.5	17	0	7.00957	500000000000	100	22.3052
Belgium	382	3128	299077	1.90442	16181.8	50.8333	4	1	27	139.003	12.1342	1313459147	NA	64.5358
Belize	9	33	225	NA	1931.43	17.25	-88.75	NA	85	0.134105	16.8372	6945393209	26.7	44.8637
Benin	18	82	2536	NA	306.154	9.5	2.25	0.267	47	0	16.8055	NA	NA	20
Bermuda	2	68	483	0.05885	29096.2	32.3333	-64.75	NA	51	NA	5.46131	1361114215	0	65.26
Bhutan	16	13	295	NA	799.714	27.5	90.5	0	55	0.377985	16.0689	17928662387	60	54.9811
Bolivia	76	238	2564	0.281146	742.431	-17	-65	0.6	161	0.419641	16.0365	17924754396	0	42.7856
Bosnia and Herzegovina	19	23	4448	0.02135	2235.95	44	18	0	51	0	0.406193	13522711118	90.5	21.9125
Botswana	7	141	3454	0.51601	1996.69	-22	24	0.905	15	6.92068	17	1830000000000	54.2	62.1079
Bouvet Island	0	0	2	NA	NA	-54.4333	3.4	NA	2	NA	NA	47320374412	62.5	31.9675
Brazil	1079	5211	461118	0.997635	2628.07	-10	-55	0.542	738	115.316	13.1689	9031040182	55.6	22.6178
British Indian Ocean Territory	0	1	15	NA	NA	-6	71.5	NA	77	NA	NA	1401675667	27.3	8.90272
Brunei	8	55	1345	0.0237833	14378.8	4.5	114.667	NA	171	5.16297	NA	10637793649	0	64.4168
Bulgaria	87	274	45348	0.499361	2632.21	43	25	0.625	45	0	12.4599	23429289763	72.2	46.3202
Burkina Faso	24	97	3372	0.202497	233.15	13	-2	0.556	16	0.22669	14.0643	1480000000000	95.8	38.2416
Burundi	8	11	281	NA	143.297	-3.5	30	0.273	48	0.317299	5.08347	1619817664	NA	19.1994
Cambodia	10	53	1556	0.0498	284.914	13	105	0	193	0.0166145	16.7554	NA	NA	52.9167
Cameroon	66	191	7543	NA	614.085	6	12	0.722	514	1.00012	8.06172	6929498811	50	4.90953
Canada	2331	18156	993461	1.91361	16162.4	60	-95	0.958	72	1140.11	7.68879	173000000000	75	21.3417
Cape Verde	2	8	94	NA	1330.51	16	-24	NA	28	0	2.4894	5720000000000	100	19.2872
Cayman Islands	2	16	171	NA	30190.7	19.5	-80.5	NA	33	NA	8.04024	255000000000	83.3	55.3279
Central African Rep.	10	17	399	NA	272.788	7	21	0.474	28	0.396348	16.4901	5.50439e+08	NA	23.6152
Chad	2	8	280	NA	249.778	15	19	0.5	23	0.311581	9.40849	31716383247	83.3	48.9557
Chile	152	2064	68974	0.342745	3263.06	-30	-71	0.75	141	11.3807	10.1406	61381868265	0	33.7841
China	1091	24660	2680395	1.08505	675.243	35	105	1	816	80.7505	10.4186	61483595220	88.9	23.5475
Christmas Island	0	2	4	NA	NA	-10.5	105.667	NA	31	NA	NA	23654583383	NA	18.3585
Cocos (Keeling) Islands	0	0	9	NA	NA	-12.5	96.8333	NA	27	NA	NA	330000000000	95.5	13.4431
Colombia	100	507	35890	0.166578	1618.58	4	-72	0.833	652	22.1757	15.1414	1105274873	NA	0.241588
Comoros	3	5	59	NA	514.163	-12.1667	44.25	NA	89	0	0	4.58226e+08	100	62.749
Cook Islands	2	5	33	NA	NA	-21.2333	-159.767	NA	50	NA	1.18125	55669048130	70.8	53.0091
Costa Rica	117	418	6491	0.366315	2361.75	10	-84	0.833	250	18.3521	16.0044	196000000000	19	0.0598943
Cote d'Ivoire	20	81	3675	NA	694.83	8	-5	0	180	NA	17	20946789917	33.3	15.8014
Croatia	39	708	57454	0.904306	7305.8	45.1667	15.5	0	84	12.7105	9.97158	10181978217	NA	61.7263
Cuba	18	99	24606	0.502999	2410.85	21.5	-80	0.889	294	1.955	5.65741	1791983259	NA	15.5228
Cyprus	7	45	10311	0.346042	11926.5	35	33	NA	33	1.33116	16.6024	19370612331	85.7	52.6052
Czech Republic	385	2211	163740	1.23212	9146.48	49.75	15.5	1	35	18.6803	16.4286	32408805861	90	13.6
Democratic Republic of the Congo	1	12	350	NA	NA	0	25	0.875	190	1.24e-06	9.36	3122844703	NA	53.6865
Denmark	381	3830	208227	2.41278	20849.2	56	10	0.955	31	390.065	12.1747	255000000000	82.6	72.9106
Djibouti	0	3	133	NA	853.582	11.5	43	NA	81	0	0.0008715	2750000000000	100	28.254
Dominica	1	2	155	NA	3136.02	15.4167	-61.3333	1	48	0.802719	13.6101	NA	NA	29.8765
Dominican Republic	2	18	705	NA	1534.44	19	-70.6667	NA	124	11.1418	12.8249	11514643886	70	85.4818
Ecuador	67	354	4568	0.109026	1682.41	-2	-77.5	0.708	2208	3.37419	15.604	769958097	40.9	45.748
Egypt	42	517	89489	0.22662	764.59	27	30	0.19	110	2.20981	6.98078	11975186320	NA	39.9601
El Salvador	5	27	803	0.0898875	1834.53	13.8333	-88.9167	0.333	64	0.43518	0.308749	3520000000000	100	32.561
Equatorial Guinea	0	4	109	NA	3199.59	2	10	NA	107	0	14.6899	30474453706	87	39.2843
Eritrea	1	9	370	NA	212.228	15	39	NA	91	0	4.80758	305000000000	100	28.1707
Estonia	129	604	19141	0.894568	8333.84	59	26	0.857	12	10.7696	10.7201	NA	NA	0.000568819
Ethiopia	66	215	8015	0.176375	198.783	8	38	0.9	101	2.19883	15.8068	7.23862e+08	NA	49.9706
Falkland Islands (Malvinas)	1	77	283	NA	NA	-51.75	-59	NA	24	NA	0.260909	NA	NA	46.2963
Faroe Islands	2	20	331	0.86117	33530.3	62	-7	NA	14	NA	NA	39396441492	89.5	38.8954
Federated States of Micronesia	3	8	143	NA	NA	NA	NA	NA	NA	0	NA	3971633121	0	27.9505
Fiji	18	67	1524	NA	1726.77	-18	175	NA	190	0.825634	2.18011	8.90486e+08	55.6	75.0325
Finland	697	4656	190192	3.30357	16776.6	64	26	0.826	21	34.1977	8.34881	2163561969	NA	84.4066
France	1071	14870	1283370	2.16963	15778.3	46	2	1	135	573.206	12.6057	14224745870	21.4	57.2177
French Guiana	5	85	699	NA	NA	4	-53	NA	52	NA	10.355	232000000000	NA	NA
French Polynesia	0	105	934	NA	9620.89	-15	-140	NA	149	NA	1.00895	129000000000	85.7	21.4986
French Southern Territories	0	0	4	NA	NA	-43	67	NA	21	NA	NA	10380706738	0	0.305519
Gabon	23	72	1497	0.54377	3784.33	-1	11.75	0.7	153	0.718745	11.2556	1550000000000	100	22.3756
Gambia	0	5	1508	NA	NA	13.4667	-16.5667	0.409	36	0.062201	3.80001	599000000000	95	56.5677
Georgia	5	55	7490	0.259271	1239.81	42	43.5	NA	49	0	7.44925	NA	0	1.87188
Germany	1499	18298	1782920	2.47898	19731.7	51	9	1	74	97.2239	17	187000000000	0	9.11285
Ghana	59	183	6825	0.23157	406.292	8	-2	0.87	174	1.36746	13.2653	207000000000	52.6	6.88158
Gibraltar	0	1	60	NA	NA	36.1833	-5.3667	NA	20	NA	5.12445	2160000000000	100	28.6199
Greece	278	1255	180688	0.57061	8608.3	39	22	1	118	1.92e-06	11.818	12966651109	50	31.4441
Greenland	5	126	609	0.588668	15196.3	72	-40	NA	13	NA	17	5330000000000	89.5	68.3775
Grenada	1	3	558	NA	3384.3	12.1167	-61.6667	NA	37	0.69229	1.9013	26273988393	35	1.10377
Guadeloupe	3	31	1025	NA	NA	16.25	-61.5833	NA	51	NA	17	124000000000	0	1.24378
Guam	6	51	587	NA	NA	13.4667	144.783	NA	35	NA	17	32735567397	65	7.19272
Guatemala	17	34	1528	0.053644	1133.32	15.5	-90.25	0.895	228	4.41298	13.4498	1.99852e+08	NA	15
Guinea	4	14	382	NA	404.449	11	-10	0	86	0	6.76259	117000000000	0	0.278998
Guinea-Bissau	0	4	325	NA	226.686	12	-15	0.556	37	0	14.1944	4497456146	0	4.24352
Guyana	8	21	423	NA	794.635	5	-59	NA	68	0	3.03657	26056248365	100	52.4987
Haiti	0	2	438	NA	NA	19	-72.4167	0	130	0	0.270028	37533969209	0	13.0487
Heard Island and McDonald Islands	0	0	1	NA	NA	-53.1	72.5167	NA	11	NA	NA	2367361708	NA	1.39342
Honduras	4	19	692	0.041676	741.262	15	-86.5	0.214	230	2.41439	13.7409	7.82243e+08	44.4	47.7471
Hong Kong	94	771	162812	0.652156	12301.2	22.25	114.167	NA	48	NA	17	NA	NA	0.123328
Hungary	284	940	112177	0.882739	4317.72	47	20	0.857	48	40.3793	5.00177	NA	NA	42.5272
Iceland	16	276	10834	2.60133	19619.4	65	-18	0	17	28.0071	11.4965	37838480711	0	32.8921
India	594	7567	750777	0.721053	423.293	20	77	1	659	79.6974	4.6854	39030086269	NA	33.4749
Indonesia	224	619	20166	0.06619	751.652	-5	120	0.95	1087	0.890654	13.3294	8819534562	87.5	22.4198
Iran	62	604	202807	0.65033	2059.21	32	53	0.696	90	0	6.44219	4868037373	77.8	37.5023
Iraq	1	26	5836	NA	1572.75	33	44	0	55	0	0	220000000000	85.7	66.1819
Ireland	140	959	104634	1.2591	15342.1	53	-8	0	26	0	1.38012	1817841483	NA	3.33333
Israel	126	1863	224674	4.08606	9958.59	31.5	34.75	0.526	127	17.778	12.033	9146467684	100	4.77057
Italy	717	6128	959688	1.09658	13334.4	42.8333	12.8333	1	138	0	9.84782	7957769512	NA	1.09375
Jamaica	5	39	3489	0.055405	1972.61	18.25	-77.5	0.5	280	0.457329	13.2677	1.96568e+08	NA	70.2222
Japan	1013	10819	1776473	3.14305	18456.8	36	138	0.895	309	0	14.7198	3465270608	0	0.303487
Jordan	17	117	19847	0.38576	1638.4	31	36	0.35	89	0	1.37725	10051872484	NA	19.7777
Kazakhstan	7	59	5654	0.233514	3048.33	48	68	0	73	1.02846	2.39459	1010000000000	87.5	34.896
Kenya	160	909	16727	0.41679	336.51	1	38	0.65	311	16.7252	12.2018	6479140377	NA	0
Kiribati	0	0	12	NA	783.887	1.4167	173	NA	87	0	15.0369	5154644900	100	7.78771
Kuwait	9	81	13775	0.145228	15948.8	29.3375	47.6581	0	39	0	3.91221	4260111416	NA	52.1636
Kyrgyzstan	1	10	976	NA	NA	41	75	0	40	0.511683	3.42585	92583400440	60.9	11.6938
Laos	16	44	1098	0.0371	427.674	18	105	0	115	1.38523	15.8535	10344420464	77.8	52.0893
Latvia	15	89	10082	0.469765	4926.44	57	25	1	21	0.789796	15.5381	NA	0	53.2968
Lebanon	12	37	13677	NA	4575.86	33.8333	35.8333	0	40	0	0.435338	10286037042	87.5	9.66237
Lesotho	0	7	319	0.0501675	314.912	-29.5	28.5	NA	11	1e-06	0.220583	14534725989	75	27.9678
Liberia	0	3	117	NA	246.989	6.5	-9.5	0.444	111	0	1.70057	815000000000	100	10.6775
Libyan Arab Jamahiriya	4	23	2747	NA	NA	25	17	NA	36	NA	NA	NA	NA	45.8972
Liechtenstein	0	4	844	NA	51846.3	47.1667	9.5333	NA	4	0	12.9744	124000000000	100	38.1154
Lithuania	35	140	24755	0.672404	5356.42	56	24	0	19	2.21788	13.209	6417052684	90.9	31.1877
Luxembourg	9	79	6736	1.61984	31198	49.75	6.1667	NA	5	1.87376	16.0275	5689154084	50	1.13167
Macao	2	6	2331	0.0776767	16797.3	22.1667	113.55	NA	10	NA	NA	195000000000	45.8	13.9746
Macedonia	16	39	5753	0.289032	2491.01	41.8333	22	0	36	1.07102	3.74298	NA	NA	68.9506
Madagascar	52	205	2251	0.179542	263.223	-20	47	0.875	636	0.512647	3.0477	427000000000	87	33.1581
Malawi	15	60	3356	NA	155.815	-13.5	34	0.778	154	0.831933	16.0851	49512143523	0	0.00646204
Malaysia	182	664	99187	0.4951	2583.06	2.5	112.5	0.857	1141	6.97522	17	183000000000	78.3	2.6838
Maldives	0	7	135	NA	2196.8	3.25	73	NA	55	0	NA	134202965	NA	86.1265
Mali	14	35	1769	0.24911	262.673	17	-4	1	25	1.22e-06	2.39806	24509296584	81	65.2573
Malta	3	33	2517	0.488391	7671.35	35.8333	14.5833	NA	25	0.344002	15.4463	8934584658	73.9	74.1889
Marshall Islands	0	1	63	NA	2020.28	9	168	NA	85	0	1.47163	17581119767	68.2	47.9073
Martinique	0	20	461	NA	NA	14.6667	-61	NA	31	NA	17	137000000000	75	59.4722
Mauritania	1	8	349	NA	456.636	20	-12	0	49	0	0.537164	192000000000	83.3	23.1915
Mauritius	11	67	1428	0.33065	3162.65	-20.2833	57.55	NA	219	4.77365	4.78695	475000000000	88.9	29.7385
Mayotte	0	4	63	NA	NA	-12.8333	45.1667	NA	68	NA	5.59679	233000000000	72.2	36.3996
Mexico	510	3587	166604	0.383794	3161.33	23	-102	0.875	897	49.7496	8.5623	NA	NA	47.4266
Moldova	2	5	4553	0.529274	767.862	47	29	0	27	0	1.27506	NA	NA	0
Monaco	1	74	1185	0.037355	75283.7	43.7333	7.4	NA	14	0	17	168000000000	40	27.9172
Mongolia	6	99	2140	0.220617	1067.07	46	105	1	36	0.366819	11.4372	NA	78.3	49.4738
Montenegro	3	12	1091	1.02631	4217.31	42	19	NA	52	0	13.2286	5536950500	16.7	14.9881
Montserrat	2	5	71	NA	NA	16.75	-62.2	NA	36	NA	5.38917	6.15165e+08	NA	42.3077
Morocco	21	151	27253	0.55293	956.587	32	-5	0.609	82	0.975946	3.11135	5.48988e+08	NA	56.9596
Mozambique	11	51	1505	0.414313	254.235	-18.25	35	0.778	189	2.65801	15.2421	434000000000	0	0.454484
Myanmar	7	25	1077	0.08079	NA	22	98	0	227	0.564708	4.7925	13451508177	81.8	46.0141
Namibia	34	168	1449	NA	2313.4	-22	17	0.875	82	15.9647	16.0934	41042781087	NA	29.4651
Nauru	0	0	14	NA	NA	-0.5333	166.917	NA	73	0	NA	8.44857e+08	NA	88.413
Nepal	59	105	6070	NA	182.539	28	84	0.75	81	1.9148	10.4082	2008893590	25	40.3609
Netherlands	802	7274	547634	1.90196	16951.7	52.5	5.75	1	23	997.627	13.9236	203000000000	NA	23.9908
Netherlands Antilles	3	28	394	NA	NA	12.25	-68.75	NA	39	NA	NA	91457515187	100	40.0869
New Caledonia	14	192	1562	NA	8878.14	-21.5	165.5	NA	355	NA	9.30132	48972655428	0	61.0265
New Zealand	509	4905	129822	1.13869	11346.3	-41	174	1	143	179.829	14.2494	5.52364e+08	NA	80.8444
Nicaragua	16	40	965	0.064885	676.735	13	-85	0.909	111	0.829914	15.2974	NA	7.7	11.8563
Niger	12	47	1183	NA	233.691	16	8	0.5	21	0.0890879	7.42133	305000000000	95.8	7.61774
Nigeria	41	461	40952	0.21966	420.67	10	8	0.458	251	4.19448	12.9024	1460000000000	100	33.179
Niue	0	0	11	NA	NA	-19.0333	-169.867	NA	41	NA	10.3765	46738285643	70	34.7266
Norfolk Island	0	0	18	NA	NA	-29.0333	167.95	NA	41	NA	11.66	55276693279	56.3	11.863
North Korea	1	2	2163	NA	NA	40	127	0	43	0	2.1639	3076630045	NA	98.6332
Northern Mariana Islands	1	4	49	NA	NA	15.2	145.75	NA	85	NA	1.82874	3093019361	NA	30.3711
Norway	350	4345	162390	1.61214	25470.9	62	10	0.87	34	124.668	11.0648	470000000000	100	68.5784
Oman	8	66	8202	NA	5695.7	21	57	0	74	0	10.4022	560000000000	100	30.315
Pakistan	33	176	58133	0.274558	364.965	30	70	0.783	99	0.252176	9.92824	5512018540	0	2.92681
Palau	1	4	106	NA	7652.64	7.5	134.5	NA	126	NA	10.2842	287000000000	68.8	31.1856
Palestine	1	28	2763	NA	NA	32	35.25	NA	17	NA	0	2956740281	75	8.56783
Panama	88	773	3561	0.288006	2404.16	9	-80	0.81	320	2.92791	15.7107	341658540	NA	12.5
Papua New Guinea	9	64	1719	NA	647.707	-6	147	0.739	446	1.24e-06	2.38628	20625045040	66.7	45.4505
Paraguay	7	26	938	0.08527	1205.44	-23	-58	0.682	47	0.222781	4.81502	43908521501	100	5.42068
Peru	66	310	8963	0.10602	1501.99	-10	-76	0.75	536	3.96804	10.4355	720000000000	66.7	13.4975
Philippines	70	313	13163	0.12211	720.255	13	122	0.833	641	0	10.5568	19092064278	0	8.78216
Poland	178	2723	346611	0.611119	5158.3	52	20	0.889	37	18.9192	17	NA	NA	36.2105
Portugal	317	1869	138892	0.87169	7114.69	39.5	-8	0.722	159	69.2515	8.10954	16552792048	50	18.6317
Puerto Rico	50	439	11209	0.49028	8843.58	18.25	-66.5	NA	101	NA	7.08814	138000000000	0	16.3755
Qatar	8	21	5788	NA	26444.2	25.5	51.25	NA	27	0.352107	2.15912	291000000000	66.7	3.54804
Republic of the Congo	36	88	2051	NA	873.718	-1	15	NA	70	0	NA	2380000000000	100	12.1999
Reunion	0	27	427	NA	NA	NA	NA	NA	104	NA	10.9976	14600000000000	87.5	33.274
Romania	502	683	92264	0.468215	3106.21	46	25	0.4	60	0	5.82694	34341820866	62.5	7.69958
Russian Federation	123	4177	586646	1.10179	4367.02	60	100	0.783	158	NA	9.9495	36086252980	50	7.54316
Rwanda	7	29	901	NA	207.668	-2	30	0.167	52	9.6	9.57479	6.33434e+08	NA	36.0952
Saint Helena	0	1	7	NA	NA	-15.9333	-5.7	NA	60	NA	14.6484	334000000000	76.2	55.7186
Saint Kitts and Nevis	1	5	124	NA	4127.84	17.3333	-62.75	NA	35	0.142747	1.03164	101000000000	40	37.9754
Saint Lucia	1	3	58	NA	NA	13.8833	-61.1333	NA	44	0.715345	10.5018	28058887187	NA	1.03983
Saint Pierre and Miquelon	0	1	4	NA	NA	46.8333	-56.3333	NA	5	NA	17	13815688007	72.2	68.5608
Saint Vincent and The Grenadines	1	4	26	0.08152	1908.27	13.25	-61.2	NA	38	0	7.09531	5833740903	88.9	48.0003
Samoa	1	12	177	NA	1382.26	-13.5833	-172.333	NA	73	NA	5.55897
San Marino	0	0	117	NA	41862.2	43.7667	12.4167	NA	1	0	NA
Sao Tome and Principe	2	4	38	NA	803.936	1	7	NA	66	0	NA
Saudi Arabia	34	405	58840	0.0560657	8691.41	25	45	0	97	47.8364	17
Senegal	16	146	5052	0.36834	525.887	14	-14	0.818	64	1.54025	16.9135
Serbia	60	162	28882	0.63907	3362.71	44	21	NA	43	0	16.2911
Seychelles	15	62	328	0.392528	4229	-4.5833	55.6667	NA	155	0.0514707	12.7508
Sierra Leone	0	9	342	NA	239.529	8.5	-11.5	0.25	94	0.00980344	4.59214
Singapore	94	378	149509	2.03842	12405.5	1.3667	103.8	NA	267	0	4.76548
Slovakia	56	1937	56552	0.626376	6138.1	48.6667	19.5	1	39	7.04074	14.0515
Slovenia	61	377	50565	1.44321	13653.4	46	15	0	77	2.81339	13.2219
Solomon Islands	2	13	222	NA	848.414	-8	159	NA	211	0	0.707986
Somalia	0	1	60	NA	115.162	10	49	0.077	123	0	0.583771
South Africa	556	4636	125303	NA	NA	-29	24	0.958	398	99.5772	6.49559
South Georgia and The South Sandwich Islands	0	0	3	NA	NA	-54.5	-37	NA	10	NA	NA
South Korea	145	1497	578625	2.6982	5992.1	127.5	37	1	NA	82.0755	5.2069
Spain	1209	8988	759811	1.04299	10190.2	40	-4	1	218	0	8.53817
Sri Lanka	34	163	8239	0.159644	578.884	7	81	0.7	534	2.87016	14.4852
Sudan	5	33	3980	NA	431.999	15	30	0.563	105	2.77912	0.981494
Suriname	2	9	191	NA	2038.02	4	-56	NA	59	0	8.85105
Svalbard and Jan Mayen	0	3	14	NA	NA	78	20	NA	3	NA	17
Swaziland	4	36	695	NA	1041.51	-26.5	31.5	NA	25	0	3.00665
Sweden	964	6801	375891	3.64886	19607.7	62	15	1	32	133.721	7.23531
Switzerland	610	5895	395703	2.76857	29333.8	47	8	1	48	258.812	16.3649
Syria	5	59	3953	NA	1036.08	35	38	0	68	NA	0.514183
Taiwan	172	1351	398720	NA	NA	23.5	121	NA	286	59.2079	11.5003
Tajikistan	1	6	880	0.0802778	343.899	39	71	0	42	0	4.12823
Tanzania	90	365	7983	0.43442	295.779	-6	35	0.842	589	9.80064	16.9457
Thailand	117	641	82209	0.222915	1343.95	15	100	0.688	443	66.6203	12.6433
Timor Leste	1	0	50	NA	467.207	-8.55	125.517	NA	15	NA	4.19977
Togo	2	20	1007	NA	278.597	8	1.1667	0.75	44	0.495635	11.2669
Tokelau	0	0	1	NA	NA	-9	-172	NA	40	NA	7.97836
Tonga	1	3	81	NA	1560.15	-20	-175	NA	56	0	14.5404
Trinidad and Tobago	14	65	3743	0.09635	5130.93	11	-61	0.667	48	1.235	16.3513
Tunisia	6	203	38334	0.680031	1533.8	34	9	1	54	4.85228	1.2584
Turkey	453	1886	306926	0.556711	2671.9	39	35	0.667	131	14.5156	2.30813
Turkmenistan	3	4	215	NA	1387.13	40	60	0	45	0	3.03626
Turks and Caicos Islands	0	9	29	NA	NA	21.75	-71.5833	NA	34	NA	16.9159
Tuvalu	1	0	15	NA	1766.87	-8	178	NA	83	0	2.529
Uganda	50	347	7389	0.315726	220.206	1	32	0.5	159	2.98031	14.3238
Ukraine	28	304	110291	1.00638	1526.58	49	32	0	60	34.4067	3.37871
United Arab Emirates	21	104	19051	NA	32919.2	24	54	0.667	42	0	14.6228
United Kingdom	2617	26279	1918650	1.77858	14766.1	54	-2	1	65	697.055	17
United States	10604	100669	7063329	2.6597	19902.1	38	-97	0.875	1192	7843.81	8.42684
United States Minor Outlying Islands	0	0	18	NA	NA	19.2833	166.6	NA	68	NA	NA
Uruguay	12	210	9552	0.303078	3392.06	-33	-56	0.625	72	0.562261	0.106478
Uzbekistan	5	22	7551	NA	670.102	41	64	0.5	52	0	2.18743
Vanuatu	6	1	215	NA	1438.48	-16	167	NA	118	0.1	4.13569
Vatican City State	0	0	13	NA	NA	41.9	12.45	NA	2	0	NA
Venezuela	56	355	27138	NA	3534.07	8	-66	0.762	259	18.9777	17
Viet Nam	42	190	16474	0.19276	470.888	16	106	0.4	408	3.4764	6.0543
Virgin Islands (British)	0	7	86	NA	NA	18.5	-64.5	NA	42	NA	NA
Virgin Islands (U.S.)	1	31	173	NA	6625.91	18.3333	-64.8333	NA	31	NA	14.2802
Wallis and Futuna	0	0	8	NA	NA	-13.3	-176.2	NA	73	NA	0.197019
Western Sahara	0	0	6	NA	NA	24.5	-13	NA	32	0	NA
Yemen	1	20	1718	NA	645.459	15	48	NA	266	0.131259	0.526018
Zambia	8	71	2608	0.0615114	476.909	-15	30	0.722	43	8.09487	17
Zimbabwe	59	262	5254	NA	567.833	-20	30	0.889	49	11.8044	16.9452

## Sheet: Sheet1
Country	Conseravation publication	Ecology publication	All publications	Research	GDP	Latitude	Longitude	protection of species	Country area (km2)	Total endengered species	Total.Domestic.funding	Terrestiral protected area (%)	population	forest area (%)	propotion of endemic species
Afghanistan	2	3	485	NA	202.879	33	65	NA	652230	32	0.0714637	0.301776	2.33229e+07	2.06782	5.6926
Albania	78	96	1543	0.120215	1428.33	41	20	0	27400	52	0	8.11051	3.0228e+06	28.4017	9.70149
Algeria	3	123	25714	0.203906	1661.76	28	3	60	2381740	75	3.57204	6.30958	3.30626e+07	0.699229	12.0401
American Samoa	3	13	113	NA	NA	-14.3333	-170	NA	NA	77	NA	1.49049	57026.2	90.0804	18.2254
Andorra	1	3	104	NA	15974.7	42.5	1.6	NA	470	9	0	5.71582	75320.4	34.0426	4.30622
Angola	0	6	442	NA	1328.13	-12.5	18.5	0	1246700	89	0.028639	11.1419	1.75637e+07	47.8088	3.91061
Antigua and Barbuda	1	0	75	NA	7229.71	17.05	-61.8	NA	440	38	1.76979	6.22126	81089.9	22.6927	9.52381
Argentina	268	2758	118347	0.456004	4031.76	-34	-64	88.9	2736690	203	29.6429	4.93564	3.87311e+07	11.4917	9.68921
Armenia	4	14	9365	0.222632	1239.19	40	45	0	28480	37	0	11.9667	3.03646e+06	11.7074	8.12641
Aruba	0	0	40	NA	21269.4	12.5	-69.9667	NA	NA	22	NA	0.0327833	95893.5	2.33333	7.56014
Australia	2398	16544	683585	1.83773	15249.5	-27	133	100	7682300	788	538.486	10.0833	2.02745e+07	16.5738	27.1683
Austria	368	2375	214844	2.16661	16548.7	47.3333	13.3333	100	82430	70	99.8574	14.6788	8.17454e+06	46.394	11.1486
Azerbaijan	5	9	7472	0.285481	1659.91	40.5	47.5	0	82620	40	0	9.71654	8.41535e+06	10.9524	7.32601
Bahamas	2	26	258	NA	10567.6	24.25	-76	NA	10010	54	1.11912	11.347	324322	51.4486	10.8647
Bahrain	0	44	3256	NA	11263.9	26	50.55	NA	760	30	5.58665	1.2718	890659	0.528917	7.95756
Bangladesh	46	143	19481	NA	253.047	24	90	70.6	130170	109	0.337079	1.77774	1.39589e+08	11.2576	11.4387
Barbados	1	25	1195	NA	5211.22	13.1667	-59.5333	NA	430	35	0.107709	0.0914725	273520	14.6512	9.26966
Belarus	2	61	24801	0.732527	2494.95	53	28	50	202820	17	0	7.00957	9.76441e+06	40.7633	4.08654
Belgium	382	3128	299077	1.90442	16181.8	50.8333	4	100	30280	27	139.003	12.1342	1.05112e+07	22.3052	5.68928
Belize	9	33	225	NA	1931.43	17.25	-88.75	NA	22810	85	0.134105	16.8372	276138	64.5358	6.05061
Benin	18	82	2536	NA	306.154	9.5	2.25	26.7	110620	47	0	16.8055	7.99055e+06	44.8637	4.16667
Bermuda	2	68	483	0.05885	29096.2	32.3333	-64.75	NA	NA	51	NA	5.46131	63301.6	20	18.0769
Bhutan	16	13	295	NA	799.714	27.5	90.5	0	38390	55	0.377985	16.0689	629874	65.26	6.6482
Bolivia	76	238	2564	0.281146	742.431	-17	-65	60	1083300	161	0.419641	16.0365	8.97111e+06	54.9811	4.41609
Bosnia and Herzegovina	19	23	4448	0.02135	2235.95	44	18	0	51000	51	0	0.406193	3.81648e+06	42.7856	9.80392
Botswana	7	141	3454	0.51601	1996.69	-22	24	90.5	566730	15	6.92068	17	1.85363e+06	21.9125	1.67598
Brazil	1079	5211	461118	0.997635	2628.07	-10	-55	54.2	8459420	738	115.316	13.1689	1.85108e+08	62.1079	10.3099
Bulgaria	87	274	45348	0.499361	2632.21	43	25	62.5	108560	45	0	12.4599	7810413	31.9675	7.42574
Burkina Faso	24	97	3372	0.202497	233.15	13	-2	55.6	273600	16	0.22669	14.0643	1.32081e+07	22.6178	2.18069
Burundi	8	11	281	NA	143.297	-3.5	30	27.3	25680	48	0.317299	5.08347	7.87225e+06	8.90272	4.6
Cambodia	10	53	1556	0.0498	284.914	13	105	0	176520	193	0.0166145	16.7554	5722370	64.4168	14.0992
Cameroon	66	191	7543	NA	614.085	6	12	72.2	472710	514	1.00012	8.06172	1.77888e+07	46.3202	9.74265
Canada	2331	18156	993461	1.91361	16162.4	60	-95	95.8	9093510	72	1140.11	7.68879	3.20611e+07	38.2416	7.5594
Cape Verde	2	8	94	NA	1330.51	16	-24	NA	4030	28	0	2.4894	460153	19.1994	15.2047
Cayman Islands	2	16	171	NA	30190.7	19.5	-80.5	NA	NA	33	NA	8.04024	46865.3	52.9167	8.51648
Chad	2	8	280	NA	249.778	15	19	50	1259200	23	0.311581	9.40849	3002596	4.90953	3
Chile	152	2064	68974	0.342745	3263.06	-30	-71	75	743530	141	11.3807	10.1406	1.59056e+07	21.3417	12.1687
China	1091	24660	2680395	1.08505	675.243	35	105	100	9327480	816	80.7505	10.4186	1291925588	19.2872	13.6683
Colombia	100	507	35890	0.166578	1618.58	4	-72	83.3	1109500	652	22.1757	15.1414	4.26241e+07	55.3279	13.0079
Comoros	3	5	59	NA	514.163	-12.1667	44.25	NA	1860	89	0	0	607591	23.6152	16.0305
Costa Rica	117	418	6491	0.366315	2361.75	10	-84	83.3	51060	250	18.3521	16.0044	4.16693e+06	48.9557	9.32886
Croatia	39	708	57454	0.904306	7305.8	45.1667	15.5	0	55960	84	12.7105	9.97158	4.43844e+06	33.7841	13.6289
Cuba	18	99	24606	0.502999	2410.85	21.5	-80	88.9	106440	294	1.955	5.65741	1.11982e+07	23.5475	21.0611
Cyprus	7	45	10311	0.346042	11926.5	35	33	NA	9240	33	1.33116	16.6024	1.00925e+06	18.3585	6.97051
Denmark	381	3830	208227	2.41278	20849.2	56	10	95.5	42430	31	390.065	12.1747	5.41695e+06	13.4431	6.06061
Djibouti	0	3	133	NA	853.582	11.5	43	NA	23180	81	0	0.0008715	765660	0.241588	10.4497
Dominica	1	2	155	NA	3136.02	15.4167	-61.3333	100	750	48	0.802719	13.6101	70575.5	62.749	10.3641
Ecuador	67	354	4568	0.109026	1682.41	-2	-77.5	70.8	248360	2208	3.37419	15.604	1.35354e+07	53.0091	13.9561
Egypt	42	517	89489	0.22662	764.59	27	30	19	995450	110	2.20981	6.98078	7.38708e+07	0.0598943	11.1455
El Salvador	5	27	803	0.0898875	1834.53	13.8333	-88.9167	33.3	20720	64	0.43518	0.308749	2762897	15.8014	4.85934
Equatorial Guinea	0	4	109	NA	3199.59	2	10	NA	28050	107	0	14.6899	610471	61.7263	5.44554
Eritrea	1	9	370	NA	212.228	15	39	NA	101000	91	0	4.80758	4.03352e+06	15.5228	8.45341
Estonia	129	604	19141	0.894568	8333.84	59	26	85.7	42390	12	10.7696	10.7201	1.36324e+06	52.6052	3.02267
Ethiopia	66	215	8015	0.176375	198.783	8	38	90	1000000	101	2.19883	15.8068	7.49191e+07	13.6	6.30487
Fiji	18	67	1524	NA	1726.77	-18	175	NA	18270	190	0.825634	2.18011	825923	53.6865	19.6825
Finland	697	4656	190192	3.30357	16776.6	64	26	82.6	303900	21	34.1977	8.34881	5.24755e+06	72.9106	4.72813
France	1071	14870	1283370	2.16963	15778.3	46	2	100	547660	135	573.206	12.6057	6.26668e+07	28.254	14.3991
French Polynesia	0	105	934	NA	9620.89	-15	-140	NA	NA	149	NA	1.00895	78083	29.8765	22.3684
Gabon	23	72	1497	0.54377	3784.33	-1	11.75	70	257670	153	0.718745	11.2556	1.35427e+06	85.4818	4.48207
Gambia	0	5	1508	NA	NA	13.4667	-16.5667	40.9	10000	36	0.062201	3.80001	1.41546e+06	45.748	4.32432
Georgia	5	55	7490	0.259271	1239.81	42	43.5	NA	69490	49	0	7.44925	4.4274e+06	39.9601	9.97963
Germany	1499	18298	1782920	2.47898	19731.7	51	9	100	348610	74	97.2239	17	8.20778e+07	32.561	9.81013
Ghana	59	183	6825	0.23157	406.292	8	-2	87	227540	174	1.36746	13.2653	2.10373e+07	39.2843	4.75
Greece	278	1255	180688	0.57061	8608.3	39	22	100	128900	118	1.92e-06	11.818	1.10151e+07	28.1707	15.0917
Greenland	5	126	609	0.588668	15196.3	72	-40	NA	NA	13	NA	17	56497.4	0.000568819	9.52381
Grenada	1	3	558	NA	3384.3	12.1167	-61.6667	NA	340	37	0.69229	1.9013	102854	49.9706	13.1274
Guam	6	51	587	NA	NA	13.4667	144.783	NA	NA	35	NA	17	156753	46.2963	14.486
Guatemala	17	34	1528	0.053644	1133.32	15.5	-90.25	89.5	107160	228	4.41298	13.4498	1.29156e+07	38.8954	11.6653
Guinea	4	14	382	NA	404.449	11	-10	0	245720	86	0	6.76259	9.64924e+06	27.9505	5.83409
Guinea-Bissau	0	4	325	NA	226.686	12	-15	55.6	28120	37	0	14.1944	1.44229e+06	75.0325	4.77569
Guyana	8	21	423	NA	794.635	5	-59	NA	196850	68	0	3.03657	744299	84.4066	3.70669
Honduras	4	19	692	0.041676	741.262	15	-86.5	21.4	111890	230	2.41439	13.7409	6.74698e+06	57.2177	9.56175
Hong Kong	94	771	162812	0.652156	12301.2	22.25	114.167	NA	1042	48	NA	17	6.79296e+06	NA	12.1739
Hungary	284	940	112177	0.882739	4317.72	47	20	85.7	90530	48	40.3793	5.00177	1.01216e+07	21.4986	9.17969
Iceland	16	276	10834	2.60133	19619.4	65	-18	0	100250	17	28.0071	11.4965	175574	0.305519	9.60452
India	594	7567	750777	0.721053	423.293	20	77	100	2973190	659	79.6974	4.6854	1124600436	22.3756	16.3241
Indonesia	224	619	20166	0.06619	751.652	-5	120	95	1811570	1087	0.890654	13.3294	2.23542e+08	56.5677	19.0386
Iraq	1	26	5836	NA	1572.75	33	44	0	NA	55	0	0	7289759	1.87188	9.16667
Ireland	140	959	104634	1.2591	15342.1	53	-8	0	68890	26	0	1.38012	2828600	9.11285	7.20461
Israel	126	1863	224674	4.08606	9958.59	31.5	34.75	52.6	21640	127	17.778	12.033	2114020	6.88158	13.3544
Italy	717	6128	959688	1.09658	13334.4	42.8333	12.8333	100	294140	138	0	9.84782	50199700	28.6199	15.3351
Jamaica	5	39	3489	0.055405	1972.61	18.25	-77.5	50	10830	280	0.457329	13.2677	1629003	31.4441	17.7945
Japan	1013	10819	1776473	3.14305	18456.8	36	138	89.5	364500	309	0	14.7198	92500572	68.3775	19.8264
Jordan	17	117	19847	0.38576	1638.4	31	36	35	88780	89	0	1.37725	844000	1.10377	11.2801
Kazakhstan	7	59	5654	0.233514	3048.33	48	68	0	2699700	73	1.02846	2.39459	9714260	1.24378	8.05085
Kenya	160	909	16727	0.41679	336.51	1	38	65	569140	311	16.7252	12.2018	8105440	7.19272	9.20761
Kiribati	0	0	12	NA	783.887	1.4167	173	NA	810	87	0	15.0369	41234	15	18.1628
Kuwait	9	81	13775	0.145228	15948.8	29.3375	47.6581	0	17820	39	0	3.91221	261962	0.278998	9.15493
Kyrgyzstan	1	10	976	NA	NA	41	75	0	191800	40	0.511683	3.42585	2172300	4.24352	6.13208
Latvia	15	89	10082	0.469765	4926.44	57	25	100	62180	21	0.789796	15.5381	2120979	52.4987	4.81651
Lebanon	12	37	13677	NA	4575.86	33.8333	35.8333	0	10230	40	0	0.435338	1804927	13.0487	9.30233
Lesotho	0	7	319	0.0501675	314.912	-29.5	28.5	NA	30360	11	1e-06	0.220583	851412	1.39342	2.94118
Liberia	0	3	117	NA	246.989	6.5	-9.5	44.4	96320	111	0	1.70057	1120314	47.7471	6.85654
Libyan Arab Jamahiriya	4	23	2747	NA	NA	25	17	NA	NA	36	NA	NA	1434576	0.123328	8.00915
Liechtenstein	0	4	844	NA	51846.3	47.1667	9.5333	NA	NA	4	0	12.9744	16504	42.5272	1.44928
Lithuania	35	140	24755	0.672404	5356.42	56	24	0	62670	19	2.21788	13.209	2778550	32.8921	4.6683
Luxembourg	9	79	6736	1.61984	31198	49.75	6.1667	NA	2590	5	1.87376	16.0275	313970	33.4749	1.65017
Madagascar	52	205	2251	0.179542	263.223	-20	47	87.5	581540	636	0.512647	3.0477	5099371	22.4198	25.5029
Malawi	15	60	3356	NA	155.815	-13.5	34	77.8	94280	154	0.831933	16.0851	3618604	37.5023	9.63524
Malaysia	182	664	99187	0.4951	2583.06	2.5	112.5	85.7	328550	1141	6.97522	17	8160975	66.1819	21.442
Maldives	0	7	135	NA	2196.8	3.25	73	NA	300	55	0	NA	89875	3.33333	12.6728
Mali	14	35	1769	0.24911	262.673	17	-4	100	1220190	25	1.22e-06	2.39806	5263730	4.77057	2.48042
Malta	3	33	2517	0.488391	7671.35	35.8333	14.5833	NA	320	25	0.344002	15.4463	326550	1.09375	7.63889
Marshall Islands	0	1	63	NA	2020.28	9	168	NA	180	85	0	1.47163	14665	70.2222	17.2065
Mauritania	1	8	349	NA	456.636	20	-12	0	1030700	49	0	0.537164	858170	0.303487	7.20588
Mauritius	11	67	1428	0.33065	3162.65	-20.2833	57.55	NA	2030	219	4.77365	4.78695	659351	19.7777	22.5862
Mexico	510	3587	166604	0.383794	3161.33	23	-102	87.5	1943950	897	49.7496	8.5623	38174114	34.896	20.3716
Monaco	1	74	1185	0.037355	75283.7	43.7333	7.4	NA	2	14	0	17	22454	0	12.069
Mongolia	6	99	2140	0.220617	1067.07	46	105	100	1553560	36	0.366819	11.4372	955514	7.78771	7.03125
Montenegro	3	12	1091	1.02631	4217.31	42	19	NA	13450	52	0	13.2286	474203	52.1636	9.04348
Morocco	21	151	27253	0.55293	956.587	32	-5	60.9	446300	82	0.975946	3.11135	12328534	11.6938	11.8168
Mozambique	11	51	1505	0.414313	254.235	-18.25	35	77.8	786380	189	2.65801	15.2421	7493278	52.0893	7.82704
Myanmar	7	25	1077	0.08079	NA	22	98	0	NA	227	0.564708	4.7925	21486424	53.2968	10.1449
Namibia	34	168	1449	NA	2313.4	-22	17	87.5	823290	82	15.9647	16.0934	602545	9.66237	5.2968
Nepal	59	105	6070	NA	182.539	28	84	75	143350	81	1.9148	10.4082	10056945	27.9678	6.94836
Netherlands	802	7274	547634	1.90196	16951.7	52.5	5.75	100	33730	23	997.627	13.9236	11486631	10.6775	4.85232
New Caledonia	14	192	1562	NA	8878.14	-21.5	165.5	NA	NA	355	NA	9.30132	79000	45.8972	20.5397
New Zealand	509	4905	129822	1.13869	11346.3	-41	174	100	263310	143	179.829	14.2494	2371800	38.1154	28.9786
Nicaragua	16	40	965	0.064885	676.735	13	-85	90.9	120340	111	0.829914	15.2974	1774696	31.1877	6.26087
Niger	12	47	1183	NA	233.691	16	8	50	1266700	21	0.0890879	7.42133	3395212	1.13167	3.18258
Nigeria	41	461	40952	0.21966	420.67	10	8	45.8	910770	251	4.19448	12.9024	45211614	13.9746	5.42741
Northern Mariana Islands	1	4	49	NA	NA	15.2	145.75	NA	NA	85	NA	1.82874	10070	68.9506	16.8067
Norway	350	4345	162390	1.61214	25470.9	62	10	87	305470	34	124.668	11.0648	3581239	33.1581	7.11111
Oman	8	66	8202	NA	5695.7	21	57	0	309500	74	0	10.4022	551737	0.00646204	9.98532
Pakistan	33	176	58133	0.274558	364.965	30	70	78.3	770880	99	0.252176	9.92824	44911810	2.6838	9.61348
Palau	1	4	106	NA	7652.64	7.5	134.5	NA	460	126	NA	10.2842	9638	86.1265	17.2073
Panama	88	773	3561	0.288006	2404.16	9	-80	81	74340	320	2.92791	15.7107	1132924	65.2573	7.93951
Papua New Guinea	9	64	1719	NA	647.707	-6	147	73.9	452860	446	1.24e-06	2.38628	1966957	74.1889	14.9386
Paraguay	7	26	938	0.08527	1205.44	-23	-58	68.2	397300	47	0.222781	4.81502	1902871	47.9073	3.89884
Peru	66	310	8963	0.10602	1501.99	-10	-76	75	1280000	536	3.96804	10.4355	10061519	59.4722	9.26189
Philippines	70	313	13163	0.12211	720.255	13	122	83.3	298170	641	0	10.5568	26273023	23.1915	24.8103
Poland	178	2723	346611	0.611119	5158.3	52	20	88.9	304200	37	18.9192	17	29637450	29.7385	6.19137
Portugal	317	1869	138892	0.87169	7114.69	39.5	-8	72.2	91470	159	69.2515	8.10954	8857716	36.3996	21.1226
Puerto Rico	50	439	11209	0.49028	8843.58	18.25	-66.5	NA	NA	101	NA	7.08814	2358000	47.4266	12.2762
Qatar	8	21	5788	NA	26444.2	25.5	51.25	NA	NA	27	0.352107	2.15912	47309	0	7.23861
Romania	502	683	92264	0.468215	3106.21	46	25	40	230060	60	0	5.82694	18406905	27.9172	9.6563
Russian Federation	123	4177	586646	1.10179	4367.02	60	100	78.3	NA	158	NA	9.9495	119897000	49.4738	12.0032
Rwanda	7	29	901	NA	207.668	-2	30	16.7	24670	52	9.6	9.57479	2933424	14.9881	5.48098
Saint Kitts and Nevis	1	5	124	NA	4127.84	17.3333	-62.75	NA	260	35	0.142747	1.03164	51197	42.3077	9.51009
Samoa	1	12	177	NA	1382.26	-13.5833	-172.333	NA	2830	73	NA	5.55897	108645	56.9596	16.9451
Saudi Arabia	34	405	58840	0.0560657	8691.41	25	45	0	2149690	97	47.8364	17	4086539	0.454484	10.8671
Senegal	16	146	5052	0.36834	525.887	14	-14	81.8	192530	64	1.54025	16.9135	3177560	46.0141	6.13563
Serbia	60	162	28882	0.63907	3362.71	44	21	NA	87460	43	0	16.2911	NA	29.4651	7.5
Seychelles	15	62	328	0.392528	4229	-4.5833	55.6667	NA	460	155	0.0514707	12.7508	41700	88.413	19.469
Sierra Leone	0	9	342	NA	239.529	8.5	-11.5	25	71620	94	0.00980344	4.59214	2181701	40.3609	4.71888
Singapore	94	378	149509	2.03842	12405.5	1.3667	103.8	NA	700	267	0	4.76548	1646400	23.9908	19.5055
Slovakia	56	1937	56552	0.626376	6138.1	48.6667	19.5	100	48090	39	7.04074	14.0515	4068095	40.0869	7.02087
Slovenia	61	377	50565	1.44321	13653.4	46	15	0	20140	77	2.81339	13.2219	1584720	61.0265	13.438
Solomon Islands	2	13	222	NA	848.414	-8	159	NA	27990	211	0	0.707986	117869	80.8444	21.1497
Somalia	0	1	60	NA	115.162	10	49	7.7	NA	123	0	0.583771	2756380	11.8563	8.47322
South Africa	556	4636	125303	NA	NA	-29	24	95.8	1214470	398	99.5772	6.49559	17396000	7.61774	16.6495
Spain	1209	8988	759811	1.04299	10190.2	40	-4	100	498800	218	0	8.53817	4.30562e+07	33.179	18.7154
Sri Lanka	34	163	8239	0.159644	578.884	7	81	70	62710	534	2.87016	14.4852	9896000	34.7266	23.3886
Sudan	5	33	3980	NA	431.999	15	30	56.3	2376000	105	2.77912	0.981494	7527450	11.863	5.28211
Suriname	2	9	191	NA	2038.02	4	-56	NA	156000	59	0	8.85105	289972	98.6332	3.0137
Swaziland	4	36	695	NA	1041.51	-26.5	31.5	NA	17200	25	0	3.00665	349233	30.3711	2.1148
Sweden	964	6801	375891	3.64886	19607.7	62	15	100	410340	32	133.721	7.23531	7484656	68.5784	5.99174
Switzerland	610	5895	395703	2.76857	29333.8	47	8	100	40000	48	258.812	16.3649	7.43765e+06	30.315	8.13743
Tajikistan	1	6	880	0.0802778	343.899	39	71	0	139960	42	0	4.12823	2064035	2.92681	6.76329
Thailand	117	641	82209	0.222915	1343.95	15	100	68.8	510890	443	66.6203	12.6433	27397178	31.1856	16.2273
Togo	2	20	1007	NA	278.597	8	1.1667	75	54390	44	0.495635	11.2669	1580513	8.56783	3.84181
Tonga	1	3	81	NA	1560.15	-20	-175	NA	720	56	0	14.5404	61600	12.5	14.8148
Trinidad and Tobago	14	65	3743	0.09635	5130.93	11	-61	66.7	5130	48	1.235	16.3513	848481	45.4505	6.60112
Tunisia	6	203	38334	0.680031	1533.8	34	9	100	155360	54	4.85228	1.2584	4220701	5.42068	10.6931
Turkey	453	1886	306926	0.556711	2671.9	39	35	66.7	769630	131	14.5156	2.30813	27553280	13.4975	15.3477
Turkmenistan	3	4	215	NA	1387.13	40	60	0	469930	45	0	3.03626	1593501	8.78216	8.95522
Turks and Caicos Islands	0	9	29	NA	NA	21.75	-71.5833	NA	NA	34	NA	16.9159	5724	36.2105	8.83978
Uganda	50	347	7389	0.315726	220.206	1	32	50	199810	159	2.98031	14.3238	6788211	18.6317	6.76734
Ukraine	28	304	110291	1.00638	1526.58	49	32	0	579320	60	34.4067	3.37871	42662150	16.3755	9.33544
United Arab Emirates	21	104	19051	NA	32919.2	24	54	66.7	83600	42	0	14.6228	4.95472e+06	3.54804	8.48485
United Kingdom	2617	26279	1918650	1.77858	14766.1	54	-2	100	241930	65	697.055	17	6.04148e+07	12.1999	10.3659
United States	10604	100669	7063329	2.6597	19902.1	38	-97	87.5	9147420	1192	7843.81	8.42684	180671000	33.274	27.9316
Uruguay	12	210	9552	0.303078	3392.06	-33	-56	62.5	175020	72	0.562261	0.106478	2538651	7.69958	11.3057
Uzbekistan	5	22	7551	NA	670.102	41	64	50	425400	52	0	2.18743	8789492	7.54316	8.09628
Vanuatu	6	1	215	NA	1438.48	-16	167	NA	12190	118	0.1	4.13569	63701	36.0952	18.8811
Venezuela	56	355	27138	NA	3534.07	8	-66	76.2	882050	259	18.9777	17	8146845	55.7186	8.4332
Viet Nam	42	190	16474	0.19276	470.888	16	106	40	310070	408	3.4764	6.0543	34743000	37.9754	13.9871
Yemen	1	20	1718	NA	645.459	15	48	NA	527970	266	0.131259	0.526018	5166311	1.03983	12.5734
Zambia	8	71	2608	0.0615114	476.909	-15	30	72.2	743390	43	8.09487	17	3049586	68.5608	2.26244
Zimbabwe	59	262	5254	NA	567.833	-20	30	88.9	386850	49	11.8044	16.9452	3752390	48.0003	2.8597
